# Supplementary material for: "If I have a cancer, it is not my fault I am a refugee”: A qualitative study with expert stakeholders on cancer care management for Syrian refugees in Jordan
Source: PubMed Central journal article supplement (PMC6764666; doi:10.1371/journal.pone.0222496), 2019-09-27
Supplement: pone.0222496.s001.pdf [file pone.0222496.s001.pdf]

**S1 Table. Study participants.** S1 Study participants.

| <b>Interviewee Code</b> | <b>Position</b>                    | <b>Gender</b> |
|-------------------------|------------------------------------|---------------|
| A1                      | Health Care Provider               | Male          |
| A2                      | Policy Maker                       | Male          |
| A3                      | Health Care Provider               | Male          |
| A4                      | Health Care Provider               | Female        |
| A5                      | Policy Maker& Health Care Provider | Female        |
| A6                      | Health Care Provider               | Male          |
| A7                      | Policy Maker& Health Care Provider | Male          |
| B1                      | Policy Maker                       | Male          |
| B2                      | Policy Maker                       | Female        |
| B3                      | Policy Maker                       | Male          |
| C1                      | Health Care Provider               | Male          |
| D1                      | Policy Maker                       | Male          |
